# Supplementary material for: Tetraspanin CD151 and integrin α3β1 contribute to the stabilization of integrin α6β4-containing cell-matrix adhesions
Source: Oxford University Press journal article supplement (doi:10.1242/jcs.235366), 2019-09-05
Supplement: jcs235366supp.pdf [file jcs235366supp.pdf]

**A**

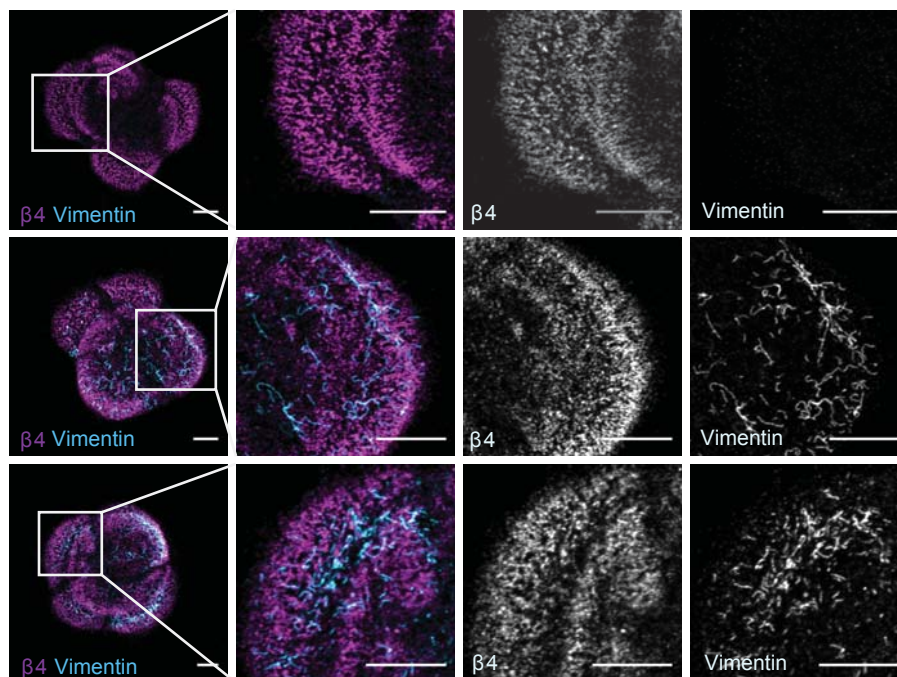

**B**

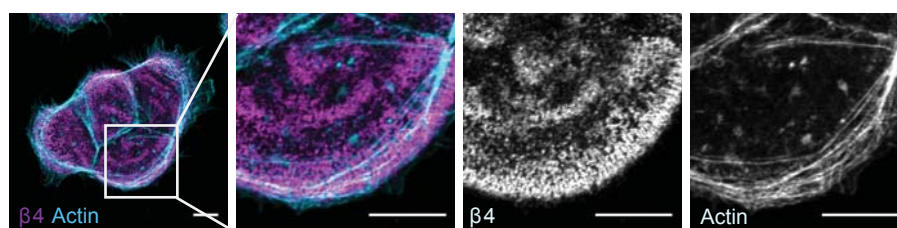

**Fig. S1  $\alpha 6\beta 4$  in central HD-like adhesions is not associated with actin or vimentin.**

Example overview and zoom-in confocal images of PA-JEB/ $\beta 4$  keratinocytes stained for  $\beta 4$  (magenta) and vimentin (A) or actin (B) (cyan). Top panel of A represents the ~ 50% of PA-JEB/ $\beta 4$  keratinocyt cell islands in which vimentin is absent. Scale bars are 10  $\mu\text{m}$ .

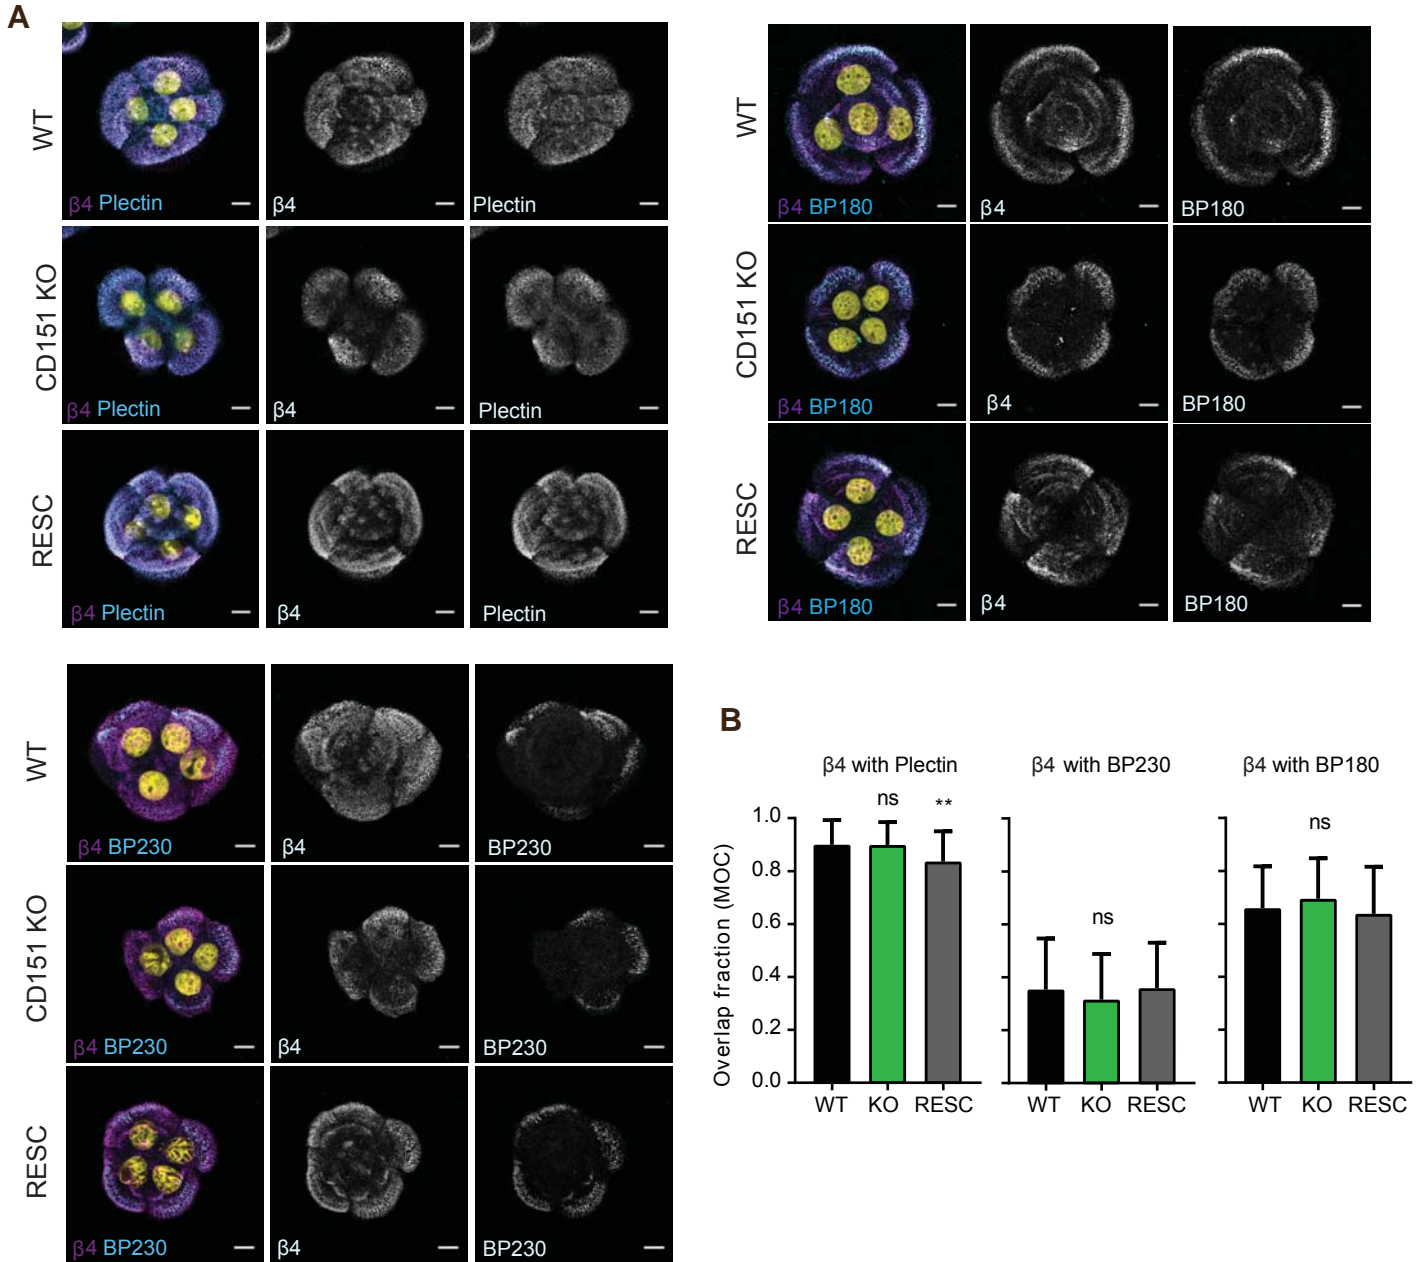

**Fig. S2 Type I HDs are formed in the absence of CD151.**

(A) Confocal images of WT, CD151-KO and CD151-RESC PA-JEB/ $\beta$ 4 keratinocytes stained for plectin, BP180 or BP230 (cyan),  $\beta$ 4 (magenta) and DAPI (yellow). Scale bars are 10  $\mu$ m. B. Quantification of the colocalization (MOC) of  $\beta$ 4 with BP180 (WT: 52 images, KO: 47 images, RESC: 48 images; 2 exp. each), BP230 (WT: 97 images, KO: 90 images, RESC: 89 images; 5 exp. each) and plectin (WT: 46 images, KO: 42 images, RESC: 41 images; 3 exp. each) in WT, CD151-KO and CD151-RESC PA-JEB/ $\beta$ 4 keratinocytes. Graphs show the mean+s.d.; P value: \*\*< 0.01 (Mann-Whitney U test), ns>0.05.

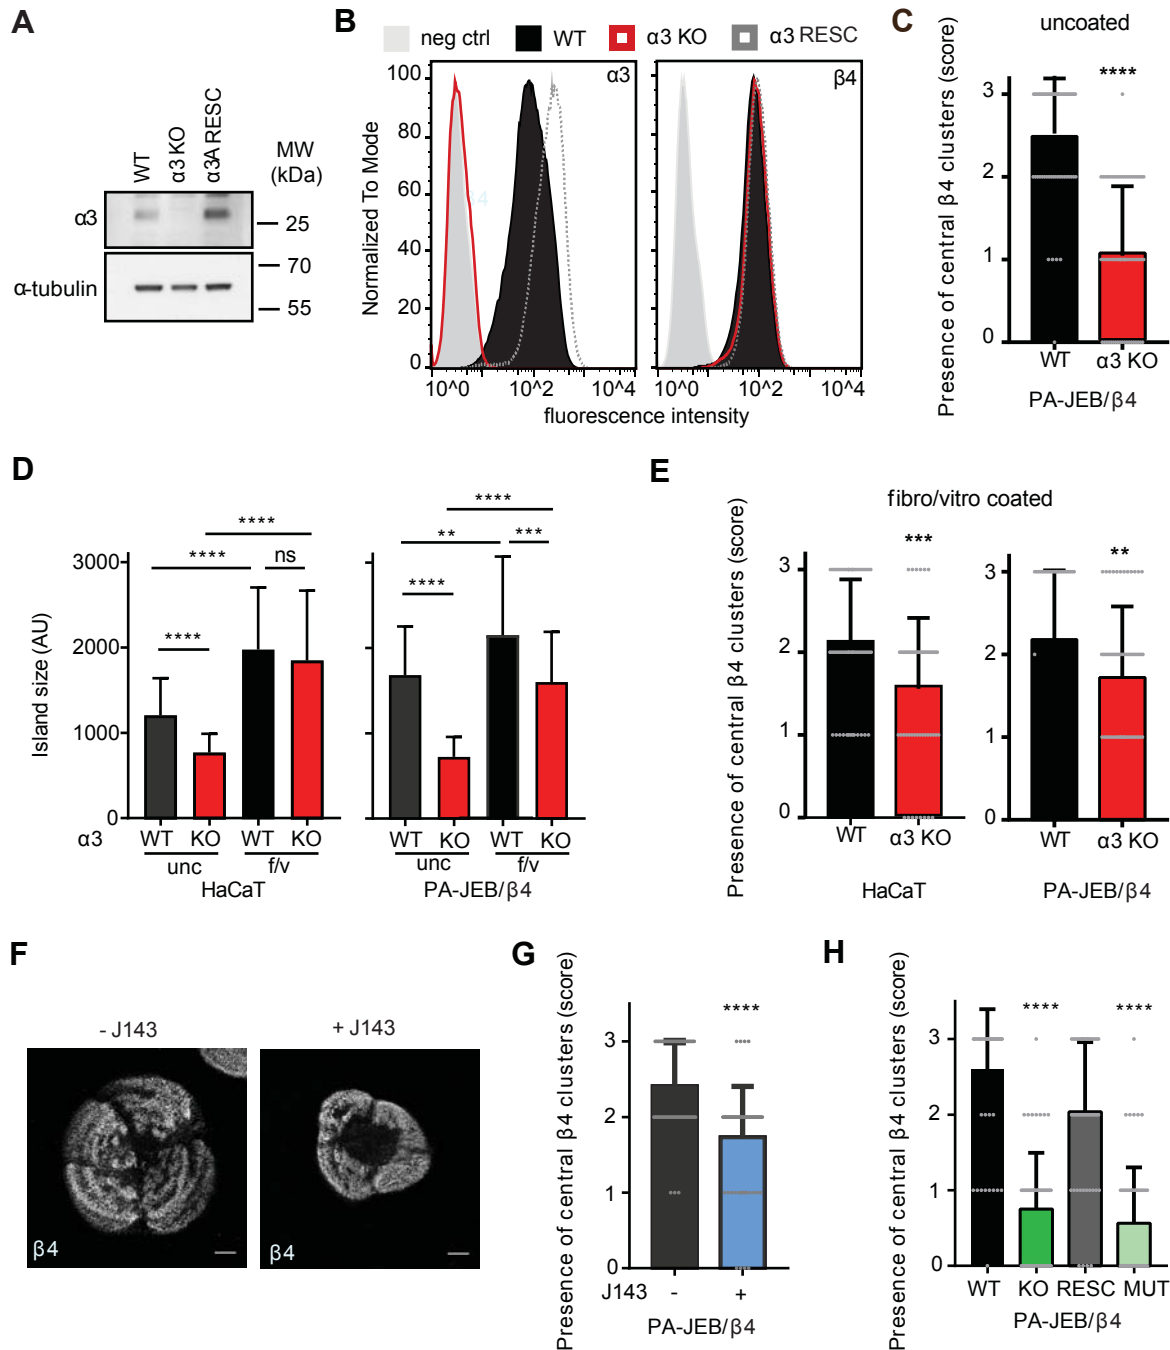

**Fig. S3 Confirmation of  $\alpha 3\beta 1$  involvement in the maintenance of central HD-like adhesions.**

(A) Whole cell lysate of WT,  $\alpha 3$ -KO and  $\alpha 3$ -RESC PA-JEB/ $\beta 4$  keratinocytes analyzed by WB for protein levels of  $\alpha 3$  and GAPDH (loading control). (B) FACS analyses of  $\alpha 3$  and  $\beta 4$  surface expression on WT,  $\alpha 3$ -KO and  $\alpha 3$ -RESC PA-JEB/ $\beta 4$  keratinocytes. (C) Quantification of the presence of central  $\beta 4$  clusters (score 0-3) in WT (61 images; 3 exp.) and  $\alpha 3$ -KO (62 images; 3 exp.) PA-JEB/ $\beta 4$  keratinocytes. (D) Island size of WT and  $\alpha 3$ -KO HaCaT and PA-JEB/ $\beta 4$  keratinocytes seeded on uncoated (unc) or fibronectin and vitronectin (f/v) coated coverslips (~60 images each; 3 exp.). (E) Quantification of the presence of central  $\beta 4$  clusters (score 0-3) in WT (60 images; 3 exp.) and  $\alpha 3$ -KO (59 images; 3 exp.) HaCaT keratinocytes, and WT (60 images; 3 exp.) and  $\alpha 3$ -KO (61 images; 3 exp.) PA-JEB/ $\beta 4$  keratinocytes seeded on fibronectin and vitronectin coated coverslips. (F) Confocal images of  $\beta 4$  in PA-JEB/ $\beta 4$  cells grown on coverslips for two days in the absence (-) or presence (+) of  $\alpha 3$  blocking antibody J143. Scale bars are 10  $\mu$ m. (G) Quantification of the presence of central  $\beta 4$  clusters (score 0-3) in WT PA-JEB/ $\beta 4$  cells grown in the absence (65 images; 3 exp.) or presence (66 images; 3 exp.) of J143. (H) Quantification of the presence of central  $\beta 4$  clusters (score 0-3) in WT (57 images; 4 exp), CD151-KO (56 images; 4 exp.), RESC (55 images; 4 exp.) and MUT (55 images; 4 exp.) PA-JEB/ $\beta 4$  keratinocytes. WT, KO and RESC data is identical to the data depicted in Fig. 2G. Graphs in C, D, E, G and H show the mean+s.d.; P values: \*\*<0.01, \*\*\*< 0.001, \*\*\*\*< 0.0001 (Mann-Whitney U test).

| Target            | Antibody                 | Application                                                                                            | Source/kind gift from                                                                |
|-------------------|--------------------------|--------------------------------------------------------------------------------------------------------|--------------------------------------------------------------------------------------|
| $\alpha$ -tubulin | Mouse mAb                | WB (1:10000)                                                                                           | Sigma-Aldrich #t5168                                                                 |
| BP230             | 5E, human mAb            | IF (1:400)                                                                                             | Takashi Hashimoto,<br>Keio University School of<br>Medicine, Shinjuku, Tokyo, Japan  |
| Coll. XVII        | VK14, mouse mAb          | IF (1:5)                                                                                               | Hendri Pas<br>University Medical Center<br>Groningen, Groningen,<br>The Netherlands  |
| CD151             | 5C11, mouse mAb          | IF (1:1), IP (1:5), WB (1:50)                                                                          | Fedor Berditchevski<br>University of Birmingham,<br>Birmingham, United Kingdom       |
| CD151             | 11G5 (IgG1), mouse mAb   | IP (1 $\mu$ g ml <sup>-1</sup> ), FACS (1:400),<br>WB (1:2000)                                         | Jonathan Humphries<br>University of Manchester,<br>Manchester, United Kingdom        |
| CD151             | 11B1.G4 (p48), mouse mAb | WB (1:2500)                                                                                            | Leonie Ashman<br>University of Newcastle,<br>Newcastle, NSW, Australia.              |
| GAPDH             | Rabbit pAb               | WB (1:2000)                                                                                            | Cell Signaling #5174                                                                 |
| GFP               | B34, mouse mAb           | WB (1:5000)                                                                                            | Covance                                                                              |
| Ilg. $\alpha$ 3   | J143, mouse mAb          | IF (1:250), IP (1 $\mu$ g ml <sup>-1</sup> ), FACS<br>(1:400), blocking (30 $\mu$ g ml <sup>-1</sup> ) | American Type Culture<br>Collection                                                  |
| Ilg. $\alpha$ 3   | A-3, mouse (IgG2a) mAb   | IF (1:100)                                                                                             | Santa Cruz #sc-374242                                                                |
| Ilg. $\alpha$ 3A  | Rabbit pAb               | WB (1:1000)                                                                                            | In-house                                                                             |
| Ilg. $\alpha$ 6   | AA6NT, rabbit pAb        | WB (1:500)                                                                                             | Anne Cress<br>University of Arizona, Tucson,<br>Arizona, USA                         |
| Ilg. $\alpha$ 6   | GoH3, rat mAb            | IP (1 $\mu$ g ml <sup>-1</sup> )                                                                       | In-house                                                                             |
| Ilg. $\beta$ 1    | Rabbit pAb               | WB (1:2000)                                                                                            | Reinhard Fässler<br>Max Planck Institute of<br>Biochemistry, Martinsried,<br>Germany |
| Ilg. $\beta$ 4    | 439-9B, rat mAb          | IF (1:200)                                                                                             | BD Bioscience #555719                                                                |
| Ilg. $\beta$ 4    | PE-rat anti-human-CD104  | FACS (1:400)                                                                                           | BD Pharmingen #555720                                                                |
| Ilg. $\beta$ 4    | ASC8, mouse, mAb         | Blocking (1:5)                                                                                         | Amy Skubitz<br>University of Minnesota,<br>Minneapolis, MN, USA                      |
| Ilg. $\beta$ 4    | Rabbit pAb               | WB (1:2000)                                                                                            | In-house                                                                             |
| Keratin 14        | Rabbit pAb               | IF (1:1000)                                                                                            | Covance #PRB-155P                                                                    |
| Laminin-332       | R14, rabbit pAb          | IF (1:500)                                                                                             | Monique Aumailley<br>University of Cologne, Cologne,<br>Germany                      |
| pPaxillin Y31     | Rabbit pAb               | IF (1:200)                                                                                             | Biosource #44-720G                                                                   |
| Plectin           | P2, guinea pig pAb       | IF (1:400)                                                                                             | Harald Herrmann<br>German Cancer Research Center,<br>Heidelberg, Germany             |

**Table S1. Primary antibodies used in various techniques**

Abbreviations used: Immune fluorescence (IF), Immune precipitation (IP), fluorescence-activated cell sorting (FACS) and Western blot (WB).

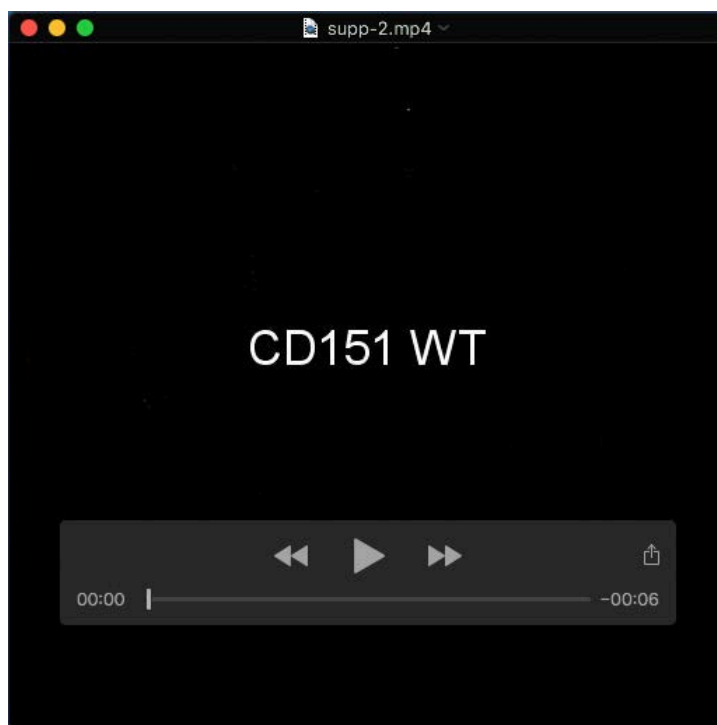

**Movie 1**

Movies of a time-lapse experiment using WT (movie S1) and CD151-KO (movie S2) PA-JEB/ $\beta$ 4-GFP keratinocytes. Images were taken every hour for 20h, starting from the addition of DMEM+FCS (0h timepoint, 20h after seeding).

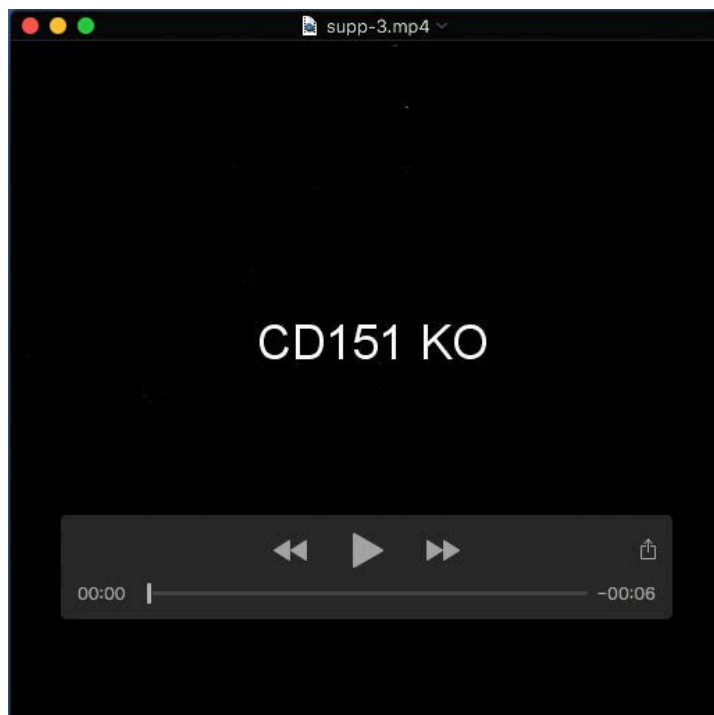

**Movie 2**

Movies of a time-lapse experiment using WT (movie S1) and CD151-KO (movie S2) PA-JEB/ $\beta$ 4-GFP keratinocytes. Images were taken every hour for 20h, starting from the addition of DMEM+FCS (0h timepoint, 20h after seeding).
